# Supplementary material
Source: PubMed Central journal article supplement (PMC2749773)
Supplement: mmc1.pdf [file mmc1.pdf]

Biophysical Journal, Volume 97

**Supporting Material**

**New insights into BAR domain induced membrane remodeling**

Gary S Ayton, Edward Lyman, Vinod Krishna, Richard D. Swenson, Carsten Mim,  
Vinzenz M. Unger, and Gregory A. Voth

# Supplemental Material:

## New insights into BAR domain induced membrane remodeling

Gary S. Ayton,<sup>†</sup> Edward Lyman,<sup>†</sup> Vinod Krishna,<sup>†</sup> Richard D. Swenson,<sup>†</sup>  
Carsten Mim,<sup>‡</sup> Vinzenz M. Unger,<sup>‡</sup> and Gregory A. Voth<sup>†\*</sup>

<sup>†</sup>*Center for Biophysical Modeling and Simulation, University of Utah, 315 S. 1400 E., Room 2020, Salt Lake City, Utah 84112-0850.*

<sup>‡</sup>*Department of Molecular Biophysics and Biochemistry, Yale University, P.O. Box 208024, New Haven, CT 06520-8024.*

### EM2 System setup and geometry

Figure S1 shows the initial conditions for the 250 nm diameter liposome EM2/SPAM simulations. The upper panel shows the relative length scales of a single N-BAR domain relative to the starting configuration for the liposome; the small yellow square on the liposome surface gives the rough size of a single N-BAR. The bottom panel shows the initial configuration of the EM2 liposome in the SPAM mesoscopic solvent. Initially, both the N-BAR density and membrane compositions,  $\phi_{B,i}$  and  $\phi_{M,i}$ , were assigned random values ranging from -1 to 1. The 250 nm liposome employs 4000 EM2 quasiparticles while the 500 nm liposome contains 15436.

Figure S2 sketches two interacting EM2 quasiparticles. The entire EM2 membrane consists of a single sheet of pair wise interacting EM2 quasi-particles each separated by  $r_{ij} = |\mathbf{r}_{ij}| = |\mathbf{r}_i - \mathbf{r}_j|$  as given in Fig. S2 (a). For each quasi-particle, two additional unit vectors, designate the membrane normal vector,  $\mathbf{\Omega}_\alpha$  and the orthogonal in-plane vector  $\mathbf{n}_\alpha^T$ ,  $\alpha = i, j$ . The resulting small angle between the two normal vectors is  $\mathbf{\Omega}_i \cdot \mathbf{\Omega}_j = \cos(\delta\theta_{ij})$ . The curvature between the two EM2 quasiparticles,  $c_{ij}$ , is found from the membrane normal vectors as shown in Fig. S2 (a),  $\delta\theta_{ij} / r_{ij} = 1 / R_{ij} = c_{ij}$ , is the local curvature between the pair. Fig S2 (b) depicts the geometry the EM2 model adopts in a tube configuration.

### Supplemental Tables

**Table S1: Parameter ranges of the different terms in the mesoscopic model, Eq. 1, in the main manuscript**

| Term      | Parameter                  | Tested values                                                               |
|-----------|----------------------------|-----------------------------------------------------------------------------|
| $H_S$     | $a_B$                      | 0.001 amu (nm/ps) <sup>2</sup>                                              |
| $H_{EM2}$ | $k_c$                      | 10 k <sub>B</sub> T                                                         |
| $H_M$     | $a_M$                      | 0.001 amu (nm/ps) <sup>2</sup>                                              |
| $H_{S,M}$ | $\Lambda_M^H, \Lambda_k^H$ | 0.05 to 0.1 k <sub>B</sub> T, 2.5 to 5 amu nm <sup>4</sup> ps <sup>-2</sup> |
| $H_O$     | $\Lambda_O$                | 5-15 amu (nm/ps) <sup>2</sup>                                               |

## Supplemental Figures

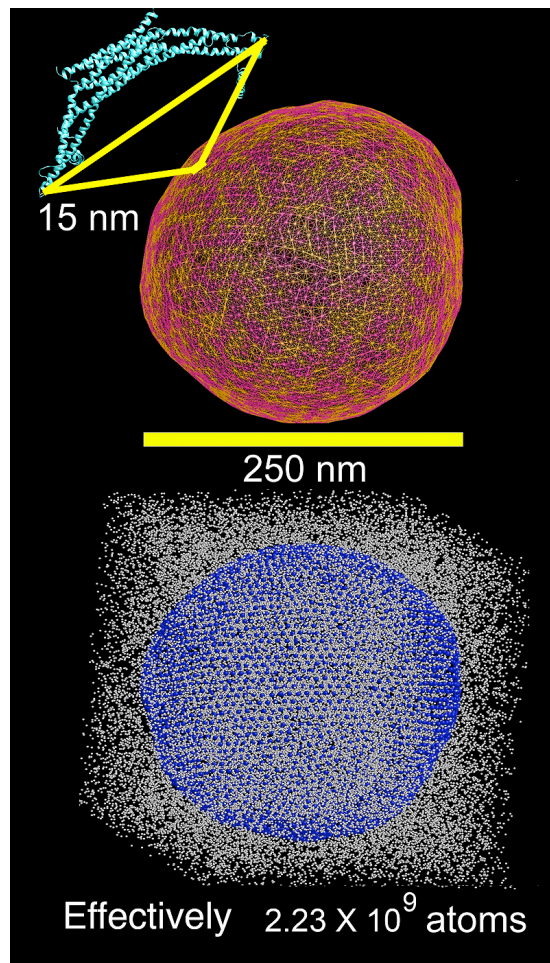

Figure S1: Snapshots of the EM2 liposome with surrounding mesoscopic solvent.

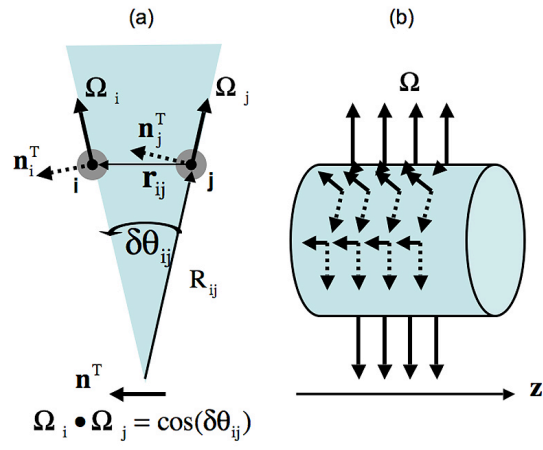

Figure S2: Panel (a) a schematic of the EM2 membrane quasi-particle geometry. Panel (b) the stabilization of tubules with the discrete EM2 membrane model.
